# Supplementary material for: Comparison of three sorbents for thin film solid phase microextraction of haloacetic acids from water
Source: Royal Society of Chemistry journal article supplement (doi:10.1039/d4ay00634h), 2024-01-01
Supplement: d4ay00634h1.pdf [file d4ay00634h1.pdf]

## Comparison of Three Sorbents for Thin Film Solid Phase Microextraction of Haloacetic Acids from Water

### Supplementary Information

P. van der Merwe<sup>1</sup> and P. Forbes<sup>1</sup>

<sup>1</sup>University of Pretoria, South Africa

Table S1: Gaussian 16 coordinates of the analyte molecules

| Analyte      | Element | X        | Y        | Z        |
|--------------|---------|----------|----------|----------|
| <b>BCAA</b>  | C       | -1.02162 | 1.329868 | -0.21771 |
|              | H       | -1.27932 | 1.632269 | -1.22462 |
|              | C       | -0.7288  | -0.16634 | -0.20659 |
|              | O       | -0.23113 | -0.59524 | 0.951876 |
|              | O       | -0.95086 | -0.85735 | -1.16909 |
|              | Cl      | 0.381747 | 2.303074 | 0.309465 |
|              | Br      | -2.62463 | 1.675459 | 0.879407 |
|              | H       | -0.08052 | -1.55318 | 0.897802 |
| <b>BDCAA</b> | C       | -1.04393 | 1.409457 | -0.12892 |
|              | C       | -0.44103 | -0.01805 | -0.26159 |
|              | O       | -0.09221 | -0.49571 | 0.928982 |
|              | O       | -0.3359  | -0.59268 | -1.3087  |
|              | Cl      | 0.027968 | 2.451437 | 0.856318 |
|              | Br      | -2.8036  | 1.20274  | 0.764614 |
|              | Cl      | -1.27343 | 2.128956 | -1.73766 |
|              | H       | 0.254334 | -1.39658 | 0.819324 |
| <b>CDBAA</b> | C       | -1.14073 | 1.326537 | -0.02447 |
|              | C       | -0.67024 | -0.15249 | -0.00173 |
|              | O       | 0.646685 | -0.23148 | 0.167612 |
|              | O       | -1.41791 | -1.08251 | -0.12406 |
|              | Br      | -0.24043 | 2.244148 | -1.52441 |
|              | Cl      | -2.89918 | 1.408573 | -0.24467 |
|              | Br      | -0.64729 | 2.168374 | 1.693011 |
|              | H       | 0.908308 | -1.16683 | 0.175573 |
| <b>DBAA</b>  | C       | -2.33623 | 0.587849 | 0.052565 |
|              | C       | -1.91473 | -0.87317 | 0.0088   |
|              | O       | -0.60984 | -1.04219 | -0.20091 |
|              | O       | -2.71542 | -1.76339 | 0.154399 |
|              | Br      | -1.48097 | 1.512747 | 1.557599 |
|              | H       | -3.40312 | 0.644782 | 0.222376 |
|              | Br      | -1.99766 | 1.462597 | -1.67128 |
|              | H       | -0.41194 | -1.99263 | -0.21821 |
| <b>DCAA</b>  | C       | -0.76124 | -0.20454 | 0.178684 |
|              | H       | -1.47924 | 0.032782 | 0.953895 |
|              | C       | -0.15403 | -1.57627 | 0.473159 |

|             |    |          |          |          |
|-------------|----|----------|----------|----------|
|             | O  | 0.744497 | -1.95159 | -0.43446 |
|             | O  | -0.48399 | -2.21693 | 1.438562 |
|             | Cl | -1.64614 | -0.22592 | -1.38537 |
|             | Cl | 0.506279 | 1.068541 | 0.210081 |
|             | H  | 1.093043 | -2.82623 | -0.19612 |
| <b>MBAA</b> | C  | -2.41979 | 0.623503 | 0.039063 |
|             | C  | -1.87012 | -0.75794 | -0.222   |
|             | O  | -0.70677 | -0.71861 | -0.88954 |
|             | O  | -2.41575 | -1.78059 | 0.119306 |
|             | H  | -2.26168 | 1.290495 | -0.80288 |
|             | H  | -3.46516 | 0.563988 | 0.318579 |
|             | Br | -1.47444 | 1.436591 | 1.574343 |
|             | H  | -0.38865 | -1.62694 | -1.01794 |
| <b>MCAA</b> | C  | -1.2526  | 1.338115 | 0.075279 |
|             | H  | -1.46417 | 1.81908  | 1.029716 |
|             | C  | -0.80296 | -0.08194 | 0.354599 |
|             | O  | 0.505916 | -0.30027 | 0.215004 |
|             | O  | -1.5978  | -0.92106 | 0.70965  |
|             | H  | -2.16619 | 1.299771 | -0.51206 |
|             | Cl | -0.07561 | 2.384835 | -0.80456 |
|             | H  | 0.689798 | -1.22665 | 0.442051 |
| <b>TBAA</b> | C  | -2.31917 | 0.640624 | 0.180722 |
|             | C  | -2.00283 | -0.83952 | -0.16051 |
|             | O  | -0.69144 | -1.02556 | -0.29696 |
|             | O  | -2.8425  | -1.68813 | -0.27992 |
|             | Br | -4.24588 | 0.894137 | 0.372807 |
|             | Br | -1.64537 | 1.777948 | -1.28201 |
|             | Br | -1.41932 | 1.095213 | 1.875623 |
|             | H  | -0.52562 | -1.95926 | -0.50727 |
| <b>TCAA</b> | C  | -3.55385 | -0.2456  | -0.05567 |
|             | C  | -3.13267 | 0.476405 | 1.261159 |
|             | O  | -2.56939 | 1.533711 | 1.284154 |
|             | O  | -3.4866  | -0.24635 | 2.318675 |
|             | H  | -3.21618 | 0.219396 | 3.127265 |
|             | Cl | -5.33722 | -0.47318 | -0.04521 |
|             | Cl | -3.08147 | 0.734861 | -1.46447 |
|             | Cl | -2.73103 | -1.84355 | -0.1249  |

Table S2: Gaussian 16 coordinates of the sorbent monomers.

| Sorbent    | Element | X        | Y        | Z        |
|------------|---------|----------|----------|----------|
| <b>HLB</b> | C       | -3.34362 | 0.45914  | -0.34806 |
|            | H       | -3.46742 | -0.23351 | 0.491035 |
|            | H       | -3.15353 | -0.13411 | -1.24449 |
|            | C       | -4.61654 | 1.296954 | -0.53176 |
|            | H       | -4.78502 | 1.911041 | 0.359846 |
|            | H       | -4.46926 | 1.987603 | -1.36967 |

|             |    |          |          |          |
|-------------|----|----------|----------|----------|
|             | C  | -5.84812 | 0.422811 | -0.78873 |
|             | H  | -5.98647 | -0.27281 | 0.047376 |
|             | H  | -5.68285 | -0.1927  | -1.68077 |
|             | C  | -7.13675 | 1.246696 | -0.97644 |
|             | H  | -7.29972 | 1.859392 | -0.08342 |
|             | H  | -6.99691 | 1.938546 | -1.81381 |
|             | C  | -8.35676 | 0.388306 | -1.22991 |
|             | C  | -9.1328  | -0.08453 | -0.16495 |
|             | C  | -8.71535 | 0.014875 | -2.53071 |
|             | C  | -10.2431 | -0.91324 | -0.36476 |
|             | H  | -8.86488 | 0.201115 | 0.849135 |
|             | C  | -9.81639 | -0.81204 | -2.75084 |
|             | H  | -8.13088 | 0.372265 | -3.3728  |
|             | C  | -10.5749 | -1.27464 | -1.67619 |
|             | H  | -10.0838 | -1.09686 | -3.76295 |
|             | N  | -2.14869 | 1.255917 | -0.1044  |
|             | C  | -1.90001 | 1.931033 | 1.173203 |
|             | C  | -1.24405 | 1.565158 | -1.06638 |
|             | C  | -0.43064 | 2.380042 | 1.057436 |
|             | H  | -2.07061 | 1.241899 | 2.003651 |
|             | C  | -0.20104 | 2.493333 | -0.45739 |
|             | H  | 0.222029 | 1.611588 | 1.477672 |
|             | H  | 0.800933 | 2.210687 | -0.78182 |
|             | O  | -1.27519 | 1.173972 | -2.23524 |
|             | H  | -0.24479 | 3.310546 | 1.593519 |
|             | H  | -0.39574 | 3.50473  | -0.83044 |
|             | H  | -2.5777  | 2.783564 | 1.295777 |
|             | H  | -11.4295 | -1.91954 | -1.85589 |
|             | C  | -11.0871 | -1.37229 | 0.805186 |
|             | H  | -10.4526 | -1.47995 | 1.690491 |
|             | H  | -11.4973 | -2.36375 | 0.588942 |
|             | C  | -12.2427 | -0.40837 | 1.127304 |
|             | H  | -12.8277 | -0.77408 | 1.97599  |
|             | H  | -11.8645 | 0.586128 | 1.380252 |
|             | H  | -12.9161 | -0.30403 | 0.271947 |
| <b>PDMS</b> | C  | -0.43971 | 0.389071 | -0.17739 |
|             | H  | -0.00387 | -0.57049 | -0.46988 |
|             | H  | 0.19697  | 0.82893  | 0.595401 |
|             | H  | -1.42231 | 0.197221 | 0.262799 |
|             | Si | -0.57676 | 1.528574 | -1.6459  |
|             | O  | 0.939263 | 1.772583 | -2.26262 |
|             | O  | -1.51726 | 0.693652 | -2.75915 |
|             | H  | -1.8082  | 1.166418 | -3.545   |
|             | C  | -1.35117 | 3.184504 | -1.25054 |
|             | H  | -2.34604 | 3.055365 | -0.81447 |
|             | H  | -0.73665 | 3.738912 | -0.53517 |
|             | H  | -1.4522  | 3.797024 | -2.15154 |
|             | Si | 2.087022 | 2.220829 | -3.35603 |
|             | C  | 3.772375 | 1.871677 | -2.62804 |
|             | H  | 4.566917 | 2.21451  | -3.29805 |

|   |          |          |          |
|---|----------|----------|----------|
| H | 3.894867 | 2.3813   | -1.66804 |
| H | 3.91188  | 0.798744 | -2.46521 |
| C | 1.820294 | 1.345542 | -4.98796 |
| H | 1.909321 | 0.261679 | -4.86754 |
| H | 0.827119 | 1.563289 | -5.39107 |
| H | 2.562793 | 1.661788 | -5.72733 |
| O | 1.859816 | 3.877297 | -3.54192 |
| H | 2.410007 | 4.332592 | -4.18652 |

Table S3: Gaussian 16 coordinates of interfaces between the analytes and sorbent monomers.

| Interaction (sorbent x analyte) | Element | X        | Y        | Z        |
|---------------------------------|---------|----------|----------|----------|
| <b>HLB x BCAA</b>               | C       | -3.75338 | 2.203156 | -0.48984 |
|                                 | H       | -4.39107 | 3.00289  | -0.10242 |
|                                 | H       | -3.17679 | 1.812028 | 0.349318 |
|                                 | C       | -4.61106 | 1.092343 | -1.11024 |
|                                 | H       | -5.17392 | 1.495757 | -1.95895 |
|                                 | H       | -3.95186 | 0.312647 | -1.5074  |
|                                 | C       | -5.58347 | 0.483158 | -0.09508 |
|                                 | H       | -6.22995 | 1.268742 | 0.313237 |
|                                 | H       | -5.0219  | 0.070585 | 0.750829 |
|                                 | C       | -6.46173 | -0.62522 | -0.70708 |
|                                 | H       | -7.0277  | -0.2066  | -1.54609 |
|                                 | H       | -5.81314 | -1.40475 | -1.12038 |
|                                 | C       | -7.41758 | -1.24217 | 0.290531 |
|                                 | C       | -8.68476 | -0.68693 | 0.504962 |
|                                 | C       | -7.04372 | -2.35833 | 1.048384 |
|                                 | C       | -9.57616 | -1.21188 | 1.447966 |
|                                 | H       | -8.98624 | 0.17855  | -0.07968 |
|                                 | C       | -7.91628 | -2.8948  | 1.994634 |
|                                 | H       | -6.06734 | -2.8079  | 0.897129 |
|                                 | C       | -9.17326 | -2.32567 | 2.194836 |
|                                 | H       | -7.6155  | -3.7587  | 2.577879 |
|                                 | N       | -2.81559 | 2.805841 | -1.43385 |
|                                 | C       | -3.25425 | 3.779221 | -2.44657 |
|                                 | C       | -1.53026 | 2.443891 | -1.57215 |
|                                 | C       | -1.93145 | 4.337255 | -3.00252 |
|                                 | H       | -3.88005 | 4.54268  | -1.98069 |
|                                 | C       | -0.91642 | 3.218177 | -2.72197 |
|                                 | H       | -1.65326 | 5.239871 | -2.45477 |
|                                 | H       | 0.081187 | 3.570216 | -2.45849 |
|                                 | O       | -0.92274 | 1.597486 | -0.8899  |
|                                 | H       | -2.00859 | 4.592431 | -4.05875 |
|                                 | H       | -0.81108 | 2.530075 | -3.56765 |
|                                 | H       | -3.84521 | 3.276328 | -3.21881 |
|                                 | H       | -9.84603 | -2.74825 | 2.934629 |
|                                 | C       | -10.9561 | -0.61521 | 1.625261 |
|                                 | H       | -10.915  | 0.460363 | 1.426913 |
|                                 | H       | -11.2698 | -0.73174 | 2.667359 |
|                                 | C       | -12.0109 | -1.25727 | 0.706794 |
|                                 | H       | -12.9921 | -0.80074 | 0.864784 |
|                                 | H       | -11.7437 | -1.12954 | -0.34599 |

|                    |    |          |          |          |
|--------------------|----|----------|----------|----------|
|                    | H  | -12.1009 | -2.32942 | 0.902783 |
|                    | C  | -0.74413 | -1.04248 | 3.10703  |
|                    | H  | 0.077787 | -1.01117 | 3.810617 |
|                    | C  | -0.52147 | 0.005941 | 2.01445  |
|                    | O  | -1.35099 | -0.09863 | 1.002817 |
|                    | O  | 0.354889 | 0.833104 | 2.149937 |
|                    | Cl | -0.84505 | -2.70849 | 2.458744 |
|                    | Br | -2.35509 | -0.5571  | 4.143505 |
|                    | H  | -1.19172 | 0.613159 | 0.296929 |
| <b>HLB x BDCAA</b> | C  | -3.60599 | 0.240158 | -0.57147 |
|                    | H  | -3.68512 | -0.39009 | 0.31918  |
|                    | H  | -3.50518 | -0.41467 | -1.43821 |
|                    | C  | -4.85306 | 1.122174 | -0.7136  |
|                    | H  | -4.92986 | 1.793207 | 0.148738 |
|                    | H  | -4.74185 | 1.755011 | -1.6009  |
|                    | C  | -6.13242 | 0.286963 | -0.8272  |
|                    | H  | -6.23522 | -0.35134 | 0.058086 |
|                    | H  | -6.05696 | -0.38604 | -1.68917 |
|                    | C  | -7.39793 | 1.153826 | -0.97326 |
|                    | H  | -7.47114 | 1.823937 | -0.11018 |
|                    | H  | -7.29311 | 1.788863 | -1.85929 |
|                    | C  | -8.66526 | 0.334922 | -1.08691 |
|                    | C  | -9.37634 | -0.04576 | 0.057311 |
|                    | C  | -9.13421 | -0.09362 | -2.33456 |
|                    | C  | -10.5293 | -0.83653 | -0.01319 |
|                    | H  | -9.02228 | 0.283323 | 1.031011 |
|                    | C  | -10.2791 | -0.88427 | -2.42596 |
|                    | H  | -8.60143 | 0.192407 | -3.2361  |
|                    | C  | -10.9718 | -1.25496 | -1.27397 |
|                    | H  | -10.6324 | -1.21263 | -3.39772 |
|                    | N  | -2.36583 | 1.005039 | -0.46468 |
|                    | C  | -1.9773  | 1.715365 | 0.763384 |
|                    | C  | -1.53888 | 1.234329 | -1.49065 |
|                    | C  | -0.51193 | 2.108593 | 0.497743 |
|                    | H  | -2.09507 | 1.057139 | 1.625999 |
|                    | C  | -0.40581 | 2.131306 | -1.03642 |
|                    | H  | 0.153884 | 1.345771 | 0.905833 |
|                    | H  | 0.548142 | 1.775026 | -1.42578 |
|                    | O  | -1.70879 | 0.782343 | -2.64422 |
|                    | H  | -0.25632 | 3.06242  | 0.957356 |
|                    | H  | -0.58142 | 3.129451 | -1.45192 |
|                    | H  | -2.61937 | 2.589767 | 0.908855 |
|                    | H  | -11.8613 | -1.8721  | -1.35351 |
|                    | C  | -11.3004 | -1.19462 | 1.239367 |
|                    | H  | -10.6053 | -1.28779 | 2.079669 |
|                    | H  | -11.7693 | -2.17485 | 1.108132 |
|                    | C  | -12.3842 | -0.16108 | 1.593784 |
|                    | H  | -12.9179 | -0.45481 | 2.502111 |
|                    | H  | -11.9441 | 0.825587 | 1.763783 |
|                    | H  | -13.1159 | -0.0679  | 0.786414 |

|                    |    |          |          |          |
|--------------------|----|----------|----------|----------|
|                    | C  | 1.774898 | 0.953579 | -5.89511 |
|                    | C  | 1.010585 | 0.766427 | -4.54162 |
|                    | O  | -0.22929 | 1.157337 | -4.64013 |
|                    | O  | 1.558003 | 0.294705 | -3.57379 |
|                    | Cl | 1.499093 | 2.59717  | -6.55599 |
|                    | Br | 1.055902 | -0.4069  | -7.15297 |
|                    | Cl | 3.52201  | 0.686947 | -5.67643 |
|                    | H  | -0.76826 | 1.005562 | -3.76365 |
| <b>HLB x CDBAA</b> | C  | -3.80043 | 2.361588 | -0.26039 |
|                    | H  | -4.54275 | 3.109585 | 0.032833 |
|                    | H  | -3.29318 | 2.033967 | 0.648225 |
|                    | C  | -4.48684 | 1.174782 | -0.94921 |
|                    | H  | -4.96044 | 1.515054 | -1.87641 |
|                    | H  | -3.72725 | 0.437935 | -1.23166 |
|                    | C  | -5.54022 | 0.519706 | -0.04984 |
|                    | H  | -6.29226 | 1.263737 | 0.237582 |
|                    | H  | -5.07089 | 0.176021 | 0.879058 |
|                    | C  | -6.24337 | -0.67014 | -0.73129 |
|                    | H  | -6.7076  | -0.32268 | -1.6604  |
|                    | H  | -5.49066 | -1.41406 | -1.01253 |
|                    | C  | -7.29199 | -1.32031 | 0.144712 |
|                    | C  | -8.61319 | -0.85718 | 0.142161 |
|                    | C  | -6.95859 | -2.37427 | 1.003703 |
|                    | C  | -9.59712 | -1.41297 | 0.968202 |
|                    | H  | -8.88365 | -0.04078 | -0.52275 |
|                    | C  | -7.92364 | -2.94004 | 1.836244 |
|                    | H  | -5.94123 | -2.75209 | 1.020971 |
|                    | C  | -9.23357 | -2.46279 | 1.820496 |
|                    | H  | -7.65372 | -3.75506 | 2.499464 |
|                    | N  | -2.81393 | 3.030704 | -1.10498 |
|                    | C  | -3.21478 | 3.942563 | -2.18879 |
|                    | C  | -1.49299 | 2.801058 | -1.07212 |
|                    | C  | -1.89443 | 4.626722 | -2.58741 |
|                    | H  | -3.96831 | 4.642842 | -1.82384 |
|                    | C  | -0.81646 | 3.622024 | -2.15153 |
|                    | H  | -1.78125 | 5.560426 | -2.03292 |
|                    | H  | 0.097233 | 4.078316 | -1.77    |
|                    | O  | -0.89358 | 2.029354 | -0.29819 |
|                    | H  | -1.86037 | 4.858333 | -3.65128 |
|                    | H  | -0.53168 | 2.939347 | -2.95934 |
|                    | H  | -3.64882 | 3.37239  | -3.01621 |
|                    | H  | -9.97855 | -2.9076  | 2.47293  |
|                    | C  | -11.0267 | -0.91835 | 0.910458 |
|                    | H  | -11.0324 | 0.147745 | 0.662935 |
|                    | H  | -11.4834 | -1.0144  | 1.900489 |
|                    | C  | -11.8847 | -1.67885 | -0.11609 |
|                    | H  | -12.9082 | -1.2935  | -0.12745 |
|                    | H  | -11.473  | -1.57579 | -1.124   |
|                    | H  | -11.9273 | -2.74541 | 0.121908 |
|                    | C  | -1.37684 | -1.96099 | 2.302931 |

|                   |    |          |          |          |
|-------------------|----|----------|----------|----------|
|                   | C  | -1.30793 | -0.97031 | 1.097418 |
|                   | O  | -1.30088 | 0.273503 | 1.504292 |
|                   | O  | -1.25925 | -1.36609 | -0.041   |
|                   | Br | -2.95975 | -1.54072 | 3.407557 |
|                   | Cl | -1.48504 | -3.64139 | 1.734759 |
|                   | Br | 0.274384 | -1.73541 | 3.371989 |
|                   | H  | -1.2136  | 0.935853 | 0.731761 |
| <b>HLB x DBAA</b> | C  | -3.32975 | 1.097067 | -0.56801 |
|                   | H  | -3.8789  | 1.168717 | -1.51142 |
|                   | H  | -3.40305 | 2.067138 | -0.0743  |
|                   | C  | -3.9372  | 0.000218 | 0.316537 |
|                   | H  | -3.82805 | -0.97082 | -0.17844 |
|                   | H  | -3.37366 | -0.05604 | 1.254278 |
|                   | C  | -5.41814 | 0.258421 | 0.612289 |
|                   | H  | -5.97481 | 0.322679 | -0.32989 |
|                   | H  | -5.53169 | 1.229267 | 1.10808  |
|                   | C  | -6.04795 | -0.83622 | 1.495196 |
|                   | H  | -5.92614 | -1.80528 | 0.999649 |
|                   | H  | -5.49707 | -0.89213 | 2.439943 |
|                   | C  | -7.51451 | -0.59492 | 1.779171 |
|                   | C  | -8.49933 | -1.07382 | 0.906855 |
|                   | C  | -7.91897 | 0.144599 | 2.896942 |
|                   | C  | -9.86167 | -0.83307 | 1.119795 |
|                   | H  | -8.19646 | -1.65102 | 0.036872 |
|                   | C  | -9.27116 | 0.397554 | 3.125578 |
|                   | H  | -7.17361 | 0.523408 | 3.589179 |
|                   | C  | -10.2364 | -0.08606 | 2.243307 |
|                   | H  | -9.57333 | 0.973736 | 3.993722 |
|                   | N  | -1.92435 | 0.86913  | -0.89383 |
|                   | C  | -1.51349 | -0.11357 | -1.90905 |
|                   | C  | -0.88809 | 1.416738 | -0.23922 |
|                   | C  | -0.021   | 0.19734  | -2.12502 |
|                   | H  | -2.11308 | 0.013716 | -2.81234 |
|                   | C  | 0.405804 | 0.872397 | -0.81227 |
|                   | H  | 0.093347 | 0.894001 | -2.9579  |
|                   | H  | 1.137396 | 1.671533 | -0.9338  |
|                   | O  | -0.95425 | 2.230491 | 0.701018 |
|                   | H  | 0.553285 | -0.69982 | -2.3531  |
|                   | H  | 0.814931 | 0.157853 | -0.08996 |
|                   | H  | -1.67188 | -1.12956 | -1.53346 |
|                   | H  | -11.2868 | 0.116938 | 2.427557 |
|                   | C  | -10.9045 | -1.40145 | 0.181112 |
|                   | H  | -10.4915 | -1.45484 | -0.83107 |
|                   | H  | -11.7608 | -0.72128 | 0.136533 |
|                   | C  | -11.3927 | -2.79929 | 0.600745 |
|                   | H  | -12.1438 | -3.17432 | -0.10032 |
|                   | H  | -10.5645 | -3.51318 | 0.62359  |
|                   | H  | -11.8425 | -2.77457 | 1.597307 |
|                   | C  | -3.3376  | 4.85345  | 3.925595 |
|                   | C  | -2.33876 | 4.314469 | 2.903224 |

|                   |    |          |          |          |
|-------------------|----|----------|----------|----------|
|                   | O  | -2.70324 | 3.182184 | 2.346997 |
|                   | O  | -1.32009 | 4.933845 | 2.678973 |
|                   | Br | -5.05592 | 5.279452 | 3.071721 |
|                   | H  | -2.96684 | 5.780764 | 4.34153  |
|                   | Br | -3.53637 | 3.612098 | 5.436677 |
|                   | H  | -2.02178 | 2.841382 | 1.678399 |
| <b>HLB x DCAA</b> | C  | -4.40618 | 2.080187 | -0.05595 |
|                   | H  | -5.07736 | 2.913967 | -0.28251 |
|                   | H  | -4.25902 | 2.052061 | 1.024702 |
|                   | C  | -5.01422 | 0.758866 | -0.54385 |
|                   | H  | -5.13657 | 0.788788 | -1.63201 |
|                   | H  | -4.31622 | -0.05641 | -0.32402 |
|                   | C  | -6.3682  | 0.475959 | 0.114797 |
|                   | H  | -7.06119 | 1.297861 | -0.09971 |
|                   | H  | -6.24822 | 0.446087 | 1.203977 |
|                   | C  | -6.99484 | -0.84912 | -0.36049 |
|                   | H  | -7.11558 | -0.81484 | -1.44843 |
|                   | H  | -6.30007 | -1.66767 | -0.14467 |
|                   | C  | -8.3311  | -1.13809 | 0.287861 |
|                   | C  | -9.52079 | -0.67688 | -0.28808 |
|                   | C  | -8.40602 | -1.83961 | 1.497161 |
|                   | C  | -10.7684 | -0.89474 | 0.308298 |
|                   | H  | -9.4744  | -0.133   | -1.22817 |
|                   | C  | -9.63882 | -2.06485 | 2.108604 |
|                   | H  | -7.49698 | -2.21001 | 1.960686 |
|                   | C  | -10.8123 | -1.59492 | 1.520032 |
|                   | H  | -9.68505 | -2.60789 | 3.046647 |
|                   | N  | -3.10866 | 2.377241 | -0.65709 |
|                   | C  | -2.96679 | 2.832346 | -2.04815 |
|                   | C  | -1.93558 | 2.149637 | -0.05244 |
|                   | C  | -1.49659 | 3.28501  | -2.12571 |
|                   | H  | -3.67459 | 3.638537 | -2.24983 |
|                   | C  | -0.80574 | 2.492894 | -1.00325 |
|                   | H  | -1.42942 | 4.355418 | -1.92194 |
|                   | H  | -0.01702 | 3.042596 | -0.48878 |
|                   | O  | -1.81507 | 1.704377 | 1.107833 |
|                   | H  | -1.06415 | 3.099475 | -3.10805 |
|                   | H  | -0.37242 | 1.553194 | -1.36217 |
|                   | H  | -3.18083 | 2.008334 | -2.73614 |
|                   | H  | -11.7679 | -1.77296 | 2.003358 |
|                   | C  | -12.0403 | -0.42065 | -0.36185 |
|                   | H  | -11.8345 | 0.494977 | -0.92499 |
|                   | H  | -12.7779 | -0.16058 | 0.403874 |
|                   | C  | -12.6471 | -1.47007 | -1.31    |
|                   | H  | -13.5624 | -1.09099 | -1.77322 |
|                   | H  | -11.9458 | -1.72895 | -2.10828 |
|                   | H  | -12.8959 | -2.38836 | -0.77069 |
|                   | C  | 2.138154 | 0.001384 | 3.190925 |
|                   | H  | 2.385521 | -1.0479  | 3.293241 |
|                   | C  | 0.810271 | 0.139554 | 2.432967 |



|                   |    |          |          |          |
|-------------------|----|----------|----------|----------|
|                   | O  | 0.416217 | 1.378988 | 2.288023 |
|                   | O  | 0.243685 | -0.85758 | 2.036434 |
|                   | Cl | 2.007235 | 0.681722 | 4.852182 |
|                   | Cl | 3.477831 | 0.774469 | 2.267533 |
|                   | H  | -0.47208 | 1.458304 | 1.775668 |
| <b>HLB x MBAA</b> | C  | -3.95391 | 2.451739 | 0.168609 |
|                   | H  | -4.49667 | 3.132936 | -0.49333 |
|                   | H  | -4.15525 | 2.764404 | 1.19448  |
|                   | C  | -4.42745 | 1.008824 | -0.05127 |
|                   | H  | -4.1973  | 0.700289 | -1.07684 |
|                   | H  | -3.86594 | 0.343906 | 0.614013 |
|                   | C  | -5.93006 | 0.853056 | 0.204163 |
|                   | H  | -6.48822 | 1.517521 | -0.46573 |
|                   | H  | -6.16524 | 1.172441 | 1.226033 |
|                   | C  | -6.41978 | -0.59403 | 0.002439 |
|                   | H  | -6.18363 | -0.91025 | -1.01905 |
|                   | H  | -5.86167 | -1.25409 | 0.674959 |
|                   | C  | -7.90324 | -0.75786 | 0.251575 |
|                   | C  | -8.82431 | -0.62085 | -0.79351 |
|                   | C  | -8.39129 | -1.01382 | 1.538778 |
|                   | C  | -10.2047 | -0.73023 | -0.58692 |
|                   | H  | -8.45611 | -0.42416 | -1.79721 |
|                   | C  | -9.76255 | -1.12315 | 1.76602  |
|                   | H  | -7.69581 | -1.12792 | 2.364368 |
|                   | C  | -10.664  | -0.98139 | 0.711555 |
|                   | H  | -10.1299 | -1.31973 | 2.767705 |
|                   | N  | -2.52741 | 2.640294 | -0.0791  |
|                   | C  | -1.97915 | 2.728589 | -1.44101 |
|                   | C  | -1.57931 | 2.62523  | 0.87345  |
|                   | C  | -0.53821 | 3.222162 | -1.21424 |
|                   | H  | -2.57904 | 3.417049 | -2.03927 |
|                   | C  | -0.21839 | 2.769985 | 0.219077 |
|                   | H  | -0.5082  | 4.311802 | -1.2778  |
|                   | H  | 0.405766 | 3.464617 | 0.781751 |
|                   | O  | -1.76699 | 2.498674 | 2.096444 |
|                   | H  | 0.151727 | 2.82081  | -1.95569 |
|                   | H  | 0.270434 | 1.790178 | 0.24728  |
|                   | H  | -2.00559 | 1.745293 | -1.92192 |
|                   | H  | -11.7302 | -1.06676 | 0.897247 |
|                   | C  | -11.1718 | -0.62164 | -1.74644 |
|                   | H  | -10.766  | 0.066559 | -2.49453 |
|                   | H  | -12.1121 | -0.18589 | -1.39443 |
|                   | C  | -11.4634 | -1.97726 | -2.41405 |
|                   | H  | -12.1639 | -1.85743 | -3.24538 |
|                   | H  | -10.5465 | -2.42629 | -2.80595 |
|                   | H  | -11.9026 | -2.67945 | -1.69987 |
|                   | C  | -4.6514  | 0.502516 | 5.415379 |
|                   | C  | -3.60624 | 0.709513 | 4.33878  |
|                   | O  | -3.64749 | 1.928216 | 3.821244 |
|                   | O  | -2.83568 | -0.16624 | 3.999375 |

|                   |    |          |          |          |
|-------------------|----|----------|----------|----------|
|                   | H  | -5.58682 | 1.000233 | 5.178783 |
|                   | H  | -4.79182 | -0.55406 | 5.6122   |
|                   | Br | -4.02538 | 1.300713 | 7.117143 |
|                   | H  | -2.93827 | 2.065917 | 3.121092 |
| <b>HLB x MCAA</b> | C  | -5.28933 | 0.654033 | 2.005806 |
|                   | H  | -6.32752 | 0.737911 | 2.341233 |
|                   | H  | -4.96251 | -0.37219 | 2.180091 |
|                   | C  | -5.18236 | 0.999047 | 0.514727 |
|                   | H  | -5.49808 | 2.035337 | 0.352311 |
|                   | H  | -4.1322  | 0.934528 | 0.209268 |
|                   | C  | -6.03343 | 0.06398  | -0.35053 |
|                   | H  | -7.08095 | 0.118252 | -0.03178 |
|                   | H  | -5.714   | -0.97297 | -0.1946  |
|                   | C  | -5.94548 | 0.398883 | -1.85202 |
|                   | H  | -6.27456 | 1.432147 | -2.00523 |
|                   | H  | -4.89737 | 0.350618 | -2.16569 |
|                   | C  | -6.77279 | -0.5289  | -2.71475 |
|                   | C  | -8.11489 | -0.24236 | -2.99138 |
|                   | C  | -6.22713 | -1.71333 | -3.2242  |
|                   | C  | -8.91632 | -1.10078 | -3.75325 |
|                   | H  | -8.54817 | 0.675792 | -2.60281 |
|                   | C  | -7.00944 | -2.58305 | -3.98311 |
|                   | H  | -5.18755 | -1.95492 | -3.02586 |
|                   | C  | -8.34513 | -2.28071 | -4.24525 |
|                   | H  | -6.57686 | -3.49916 | -4.37116 |
|                   | N  | -4.47359 | 1.512836 | 2.859543 |
|                   | C  | -4.83382 | 2.907362 | 3.153167 |
|                   | C  | -3.27457 | 1.160373 | 3.346202 |
|                   | C  | -3.86812 | 3.292323 | 4.289791 |
|                   | H  | -5.88413 | 2.967358 | 3.444864 |
|                   | C  | -2.68279 | 2.329515 | 4.110053 |
|                   | H  | -4.34715 | 3.11749  | 5.255172 |
|                   | H  | -2.23315 | 1.995437 | 5.04558  |
|                   | O  | -2.73985 | 0.048097 | 3.169733 |
|                   | H  | -3.57834 | 4.341235 | 4.240732 |
|                   | H  | -1.88488 | 2.761032 | 3.496297 |
|                   | H  | -4.68972 | 3.528319 | 2.263159 |
|                   | H  | -8.94787 | -2.96402 | -4.83545 |
|                   | C  | -10.352  | -0.74085 | -4.07106 |
|                   | H  | -10.7734 | -0.16291 | -3.24265 |
|                   | H  | -10.9459 | -1.65678 | -4.15056 |
|                   | C  | -10.4948 | 0.066808 | -5.37326 |
|                   | H  | -11.544  | 0.306316 | -5.56792 |
|                   | H  | -9.93831 | 1.00646  | -5.3146  |
|                   | H  | -10.1121 | -0.49735 | -6.2284  |
|                   | C  | 1.856366 | -1.10347 | 4.084595 |
|                   | H  | 2.563106 | -0.28083 | 4.170358 |
|                   | C  | 0.561631 | -0.56744 | 3.492366 |
|                   | O  | -0.52219 | -0.7497  | 4.210834 |
|                   | O  | 0.608532 | -0.01645 | 2.407743 |

|                   |    |          |          |          |
|-------------------|----|----------|----------|----------|
|                   | H  | 2.263409 | -1.84824 | 3.403575 |
|                   | Cl | 1.735959 | -1.87888 | 5.714482 |
|                   | H  | -1.35242 | -0.37367 | 3.755596 |
| <b>HLB x TBAA</b> | C  | -4.71508 | 2.741092 | 0.42727  |
|                   | H  | -5.64425 | 3.313951 | 0.355512 |
|                   | H  | -4.51617 | 2.554786 | 1.483608 |
|                   | C  | -4.84524 | 1.414289 | -0.33177 |
|                   | H  | -5.01517 | 1.613698 | -1.39533 |
|                   | H  | -3.89846 | 0.868204 | -0.25736 |
|                   | C  | -5.98736 | 0.551652 | 0.214789 |
|                   | H  | -6.93214 | 1.103136 | 0.143937 |
|                   | H  | -5.82167 | 0.353187 | 1.28003  |
|                   | C  | -6.12818 | -0.78851 | -0.53256 |
|                   | H  | -6.29268 | -0.58639 | -1.59623 |
|                   | H  | -5.18367 | -1.33764 | -0.4571  |
|                   | C  | -7.25472 | -1.64773 | -0.00142 |
|                   | C  | -8.54864 | -1.53394 | -0.52331 |
|                   | C  | -7.03787 | -2.54861 | 1.048211 |
|                   | C  | -9.619   | -2.28769 | -0.02739 |
|                   | H  | -8.72766 | -0.83905 | -1.33989 |
|                   | C  | -8.09129 | -3.30644 | 1.558284 |
|                   | H  | -6.04202 | -2.65674 | 1.466575 |
|                   | C  | -9.37354 | -3.17679 | 1.025947 |
|                   | H  | -7.91244 | -4.00004 | 2.373086 |
|                   | N  | -3.63311 | 3.586937 | -0.07115 |
|                   | C  | -3.73572 | 4.342109 | -1.3292  |
|                   | C  | -2.41947 | 3.654294 | 0.48765  |
|                   | C  | -2.51115 | 5.275054 | -1.2841  |
|                   | H  | -4.68438 | 4.880813 | -1.36252 |
|                   | C  | -1.52875 | 4.551173 | -0.34819 |
|                   | H  | -2.796   | 6.236756 | -0.85311 |
|                   | H  | -0.94123 | 5.217224 | 0.284229 |
|                   | O  | -2.08893 | 3.044553 | 1.527754 |
|                   | H  | -2.10016 | 5.45663  | -2.27628 |
|                   | H  | -0.82753 | 3.911369 | -0.8946  |
|                   | H  | -3.70033 | 3.65642  | -2.18155 |
|                   | H  | -10.1886 | -3.76942 | 1.429654 |
|                   | C  | -10.9971 | -2.17362 | -0.64338 |
|                   | H  | -11.1499 | -1.15201 | -1.00516 |
|                   | H  | -11.754  | -2.35168 | 0.126923 |
|                   | C  | -11.2191 | -3.1583  | -1.80509 |
|                   | H  | -12.2238 | -3.04554 | -2.22244 |
|                   | H  | -10.4975 | -2.9856  | -2.60847 |
|                   | H  | -11.1063 | -4.19285 | -1.46894 |
|                   | C  | 2.304982 | 2.422897 | 3.24897  |
|                   | C  | 0.935136 | 2.198576 | 2.530495 |
|                   | O  | 0.182156 | 3.263219 | 2.603108 |
|                   | O  | 0.668745 | 1.151251 | 1.991191 |
|                   | Br | 3.406872 | 0.807804 | 3.1745   |
|                   | Br | 1.96904  | 2.894833 | 5.135959 |

|                   |    |          |          |          |
|-------------------|----|----------|----------|----------|
|                   | Br | 3.250919 | 3.899216 | 2.339032 |
|                   | H  | -0.72905 | 3.141344 | 2.121595 |
| <b>HLB x TCAA</b> | C  | -3.466   | 0.500482 | -0.31016 |
|                   | H  | -3.57376 | -0.06197 | 0.621923 |
|                   | H  | -3.24584 | -0.21036 | -1.10786 |
|                   | C  | -4.75724 | 1.267626 | -0.6223  |
|                   | H  | -4.955   | 1.995118 | 0.17234  |
|                   | H  | -4.61833 | 1.836588 | -1.54811 |
|                   | C  | -5.95846 | 0.327256 | -0.76447 |
|                   | H  | -6.0855  | -0.24974 | 0.158952 |
|                   | H  | -5.76431 | -0.39969 | -1.56161 |
|                   | C  | -7.26806 | 1.077884 | -1.07395 |
|                   | H  | -7.46002 | 1.801353 | -0.27448 |
|                   | H  | -7.13857 | 1.65278  | -1.99694 |
|                   | C  | -8.45852 | 0.154956 | -1.21751 |
|                   | C  | -9.22075 | -0.20803 | -0.10075 |
|                   | C  | -8.80179 | -0.38734 | -2.46177 |
|                   | C  | -10.303  | -1.09096 | -0.19484 |
|                   | H  | -8.96441 | 0.209051 | 0.869873 |
|                   | C  | -9.87475 | -1.27062 | -2.57618 |
|                   | H  | -8.22735 | -0.1176  | -3.34249 |
|                   | C  | -10.6199 | -1.62171 | -1.45113 |
|                   | H  | -10.1307 | -1.68667 | -3.54487 |
|                   | N  | -2.29734 | 1.366447 | -0.17269 |
|                   | C  | -2.07073 | 2.206817 | 1.01312  |
|                   | C  | -1.39849 | 1.568137 | -1.14181 |
|                   | C  | -0.61816 | 2.687203 | 0.836113 |
|                   | H  | -2.2201  | 1.617405 | 1.919527 |
|                   | C  | -0.37671 | 2.586932 | -0.67942 |
|                   | H  | 0.059499 | 2.015437 | 1.366372 |
|                   | H  | 0.633127 | 2.277895 | -0.95081 |
|                   | O  | -1.42978 | 1.005478 | -2.25849 |
|                   | H  | -0.47138 | 3.693622 | 1.225768 |
|                   | H  | -0.58396 | 3.528971 | -1.19825 |
|                   | H  | -2.78183 | 3.038667 | 1.023499 |
|                   | H  | -11.4527 | -2.31128 | -1.54832 |
|                   | C  | -11.134  | -1.42957 | 1.024299 |
|                   | H  | -10.4956 | -1.41988 | 1.913246 |
|                   | H  | -11.5223 | -2.44815 | 0.926266 |
|                   | C  | -12.3101 | -0.46022 | 1.237825 |
|                   | H  | -12.8848 | -0.73752 | 2.12608  |
|                   | H  | -11.9536 | 0.564976 | 1.371692 |
|                   | H  | -12.9876 | -0.47081 | 0.379385 |
|                   | C  | 1.263879 | 2.220293 | -5.98789 |
|                   | C  | 0.092224 | 2.162771 | -4.94473 |
|                   | O  | -0.88655 | 2.859366 | -5.05905 |
|                   | O  | 0.351332 | 1.296672 | -4.00575 |
|                   | H  | -0.40248 | 1.237571 | -3.28911 |
|                   | Cl | 1.496973 | 0.583862 | -6.70245 |
|                   | Cl | 0.893819 | 3.385216 | -7.28738 |

|                     |    |          |          |          |
|---------------------|----|----------|----------|----------|
|                     | Cl | 2.769047 | 2.732068 | -5.13907 |
| <b>PDMS x BCAA</b>  | C  | -0.97599 | 1.160183 | -0.23481 |
|                     | H  | -0.62507 | 0.126275 | -0.28606 |
|                     | H  | -0.48699 | 1.651338 | 0.61056  |
|                     | H  | -2.05106 | 1.14395  | -0.03177 |
|                     | Si | -0.65687 | 2.064305 | -1.82975 |
|                     | O  | 0.992276 | 1.919512 | -2.21864 |
|                     | O  | -1.5199  | 1.282229 | -3.02787 |
|                     | H  | -1.16039 | 1.43824  | -3.91495 |
|                     | C  | -1.0953  | 3.878002 | -1.74788 |
|                     | H  | -2.14726 | 4.000716 | -1.47306 |
|                     | H  | -0.48769 | 4.394421 | -0.99917 |
|                     | H  | -0.93992 | 4.370245 | -2.71207 |
|                     | Si | 1.824841 | 2.086884 | -3.67579 |
|                     | C  | 2.671915 | 3.745085 | -3.75769 |
|                     | H  | 3.18403  | 3.869275 | -4.71675 |
|                     | H  | 1.95618  | 4.563123 | -3.64303 |
|                     | H  | 3.421634 | 3.832321 | -2.96593 |
|                     | C  | 2.995944 | 0.648989 | -3.8481  |
|                     | H  | 3.756541 | 0.660713 | -3.06241 |
|                     | H  | 2.457544 | -0.3008  | -3.79093 |
|                     | H  | 3.510681 | 0.693092 | -4.81263 |
|                     | O  | 0.576549 | 1.98958  | -4.8038  |
|                     | H  | 0.715125 | 2.343381 | -5.68767 |
|                     | C  | 4.029952 | 1.423798 | 1.657888 |
|                     | H  | 4.498848 | 2.243219 | 2.187303 |
|                     | C  | 3.094974 | 1.983563 | 0.58641  |
|                     | O  | 2.613391 | 1.062679 | -0.22646 |
|                     | O  | 2.852212 | 3.16835  | 0.548435 |
|                     | Cl | 5.328429 | 0.403586 | 0.966924 |
|                     | Br | 2.963013 | 0.450961 | 3.004094 |
|                     | H  | 2.008732 | 1.459143 | -0.91265 |
| <b>PDMS x BDCAA</b> | C  | -0.96743 | 0.770277 | -0.36134 |
|                     | H  | -0.69636 | -0.2583  | -0.61267 |
|                     | H  | -0.42523 | 1.062135 | 0.541825 |
|                     | H  | -2.03602 | 0.791946 | -0.12698 |
|                     | Si | -0.61764 | 1.929358 | -1.7742  |
|                     | O  | 1.006592 | 1.734371 | -2.24762 |
|                     | O  | -1.56981 | 1.450201 | -3.06021 |
|                     | H  | -1.23048 | 1.75547  | -3.91574 |
|                     | C  | -0.90101 | 3.724029 | -1.34337 |
|                     | H  | -1.93113 | 3.874265 | -1.0066  |
|                     | H  | -0.23219 | 4.043097 | -0.53881 |
|                     | H  | -0.73101 | 4.373739 | -2.20641 |
|                     | Si | 1.807205 | 2.11718  | -3.6848  |
|                     | C  | 2.807122 | 3.675912 | -3.47894 |
|                     | H  | 3.298264 | 3.946136 | -4.41871 |
|                     | H  | 2.178725 | 4.514017 | -3.16694 |
|                     | H  | 3.586756 | 3.533074 | -2.72501 |

|                     |    |          |          |          |
|---------------------|----|----------|----------|----------|
|                     | C  | 2.825268 | 0.642702 | -4.19166 |
|                     | H  | 3.606857 | 0.428302 | -3.4574  |
|                     | H  | 2.197766 | -0.24657 | -4.29534 |
|                     | H  | 3.312206 | 0.831853 | -5.15304 |
|                     | O  | 0.523503 | 2.357019 | -4.74924 |
|                     | H  | 0.6525   | 2.920583 | -5.51826 |
|                     | C  | 4.055402 | 0.247961 | 1.320839 |
|                     | C  | 3.147326 | 1.13501  | 0.412311 |
|                     | O  | 2.586498 | 0.416683 | -0.53657 |
|                     | O  | 3.000225 | 2.312688 | 0.61077  |
|                     | Cl | 5.160784 | -0.74905 | 0.32303  |
|                     | Br | 2.846747 | -0.92703 | 2.370183 |
|                     | Cl | 5.004917 | 1.262881 | 2.431393 |
|                     | H  | 1.994275 | 0.974821 | -1.12032 |
| <b>PDMS x CDBAA</b> |    |          |          |          |
|                     | C  | -1.16892 | 1.007994 | -0.28328 |
|                     | H  | -0.83266 | -0.02881 | -0.3639  |
|                     | H  | -0.71357 | 1.452801 | 0.605449 |
|                     | H  | -2.25263 | 1.002437 | -0.13265 |
|                     | Si | -0.75929 | 1.977738 | -1.81737 |
|                     | O  | 0.91065  | 1.837777 | -2.11954 |
|                     | O  | -1.55563 | 1.252808 | -3.09461 |
|                     | H  | -1.16168 | 1.467213 | -3.95415 |
|                     | C  | -1.1935  | 3.78909  | -1.6823  |
|                     | H  | -2.25826 | 3.905658 | -1.45897 |
|                     | H  | -0.62525 | 4.269741 | -0.88077 |
|                     | H  | -0.98569 | 4.32127  | -2.61479 |
|                     | Si | 1.816252 | 2.118678 | -3.51735 |
|                     | C  | 2.661117 | 3.777206 | -3.42786 |
|                     | H  | 3.220112 | 3.97525  | -4.34751 |
|                     | H  | 1.939475 | 4.585448 | -3.28462 |
|                     | H  | 3.370395 | 3.799877 | -2.5954  |
|                     | C  | 2.996854 | 0.696039 | -3.73911 |
|                     | H  | 3.718398 | 0.647402 | -2.91885 |
|                     | H  | 2.458437 | -0.25456 | -3.78026 |
|                     | H  | 3.557376 | 0.812486 | -4.67154 |
|                     | O  | 0.62662  | 2.108115 | -4.71028 |
|                     | H  | 0.787581 | 2.576512 | -5.53508 |
|                     | C  | 3.733635 | 0.79624  | 1.778958 |
|                     | C  | 2.861152 | 1.559784 | 0.737431 |
|                     | O  | 2.368338 | 0.736862 | -0.16366 |
|                     | O  | 2.693695 | 2.750576 | 0.793993 |
|                     | Br | 5.236365 | -0.06421 | 0.823988 |
|                     | Cl | 4.373624 | 1.915801 | 2.99976  |
|                     | Br | 2.616    | -0.57261 | 2.663421 |
|                     | H  | 1.820089 | 1.222699 | -0.84612 |
| <b>PDMS x DBAA</b>  |    |          |          |          |
|                     | C  | -1.17779 | 1.096522 | -0.25404 |
|                     | H  | -0.85614 | 0.054761 | -0.33086 |
|                     | H  | -0.72081 | 1.536567 | 0.63625  |
|                     | H  | -2.26221 | 1.106951 | -0.10878 |

|                    |    |          |          |          |
|--------------------|----|----------|----------|----------|
|                    | Si | -0.7446  | 2.056583 | -1.78818 |
|                    | O  | 0.919923 | 1.881682 | -2.08873 |
|                    | O  | -1.5567  | 1.349069 | -3.06591 |
|                    | H  | -1.15127 | 1.545588 | -3.9245  |
|                    | C  | -1.1417  | 3.876754 | -1.65352 |
|                    | H  | -2.20438 | 4.016341 | -1.43348 |
|                    | H  | -0.5657  | 4.34488  | -0.85008 |
|                    | H  | -0.91903 | 4.404496 | -2.58516 |
|                    | Si | 1.836634 | 2.107456 | -3.48643 |
|                    | C  | 2.741061 | 3.735614 | -3.42076 |
|                    | H  | 3.305335 | 3.900597 | -4.34378 |
|                    | H  | 2.048252 | 4.570579 | -3.28861 |
|                    | H  | 3.451931 | 3.745299 | -2.58939 |
|                    | C  | 2.966327 | 0.640478 | -3.68665 |
|                    | H  | 3.682173 | 0.575745 | -2.86251 |
|                    | H  | 2.393735 | -0.29035 | -3.71837 |
|                    | H  | 3.534491 | 0.724579 | -4.61794 |
|                    | O  | 0.650595 | 2.122623 | -4.68369 |
|                    | H  | 0.838895 | 2.552442 | -5.52355 |
|                    | C  | 3.667622 | 0.93954  | 1.917125 |
|                    | C  | 2.794024 | 1.613657 | 0.86406  |
|                    | O  | 2.397946 | 0.801535 | -0.098   |
|                    | O  | 2.525457 | 2.790399 | 0.95818  |
|                    | Br | 2.694303 | -0.50253 | 2.827338 |
|                    | H  | 3.932514 | 1.659294 | 2.680153 |
|                    | Br | 5.358009 | 0.325105 | 1.125145 |
|                    | H  | 1.842045 | 1.277833 | -0.77456 |
| <b>PDMS x DCAA</b> | C  | -1.17442 | 0.958518 | -0.30775 |
|                    | H  | -0.77908 | -0.05667 | -0.39647 |
|                    | H  | -0.75867 | 1.41511  | 0.59425  |
|                    | H  | -2.25832 | 0.890256 | -0.17459 |
|                    | Si | -0.79381 | 1.966889 | -1.82494 |
|                    | O  | 0.882546 | 1.913778 | -2.10676 |
|                    | O  | -1.53932 | 1.219843 | -3.12013 |
|                    | H  | -1.12809 | 1.438646 | -3.97073 |
|                    | C  | -1.31617 | 3.75358  | -1.67467 |
|                    | H  | -2.38943 | 3.819588 | -1.47259 |
|                    | H  | -0.78647 | 4.248536 | -0.8556  |
|                    | H  | -1.11215 | 4.306472 | -2.59599 |
|                    | Si | 1.803991 | 2.175502 | -3.49511 |
|                    | C  | 2.600624 | 3.8595   | -3.4402  |
|                    | H  | 3.170477 | 4.04745  | -4.35531 |
|                    | H  | 1.85281  | 4.649495 | -3.33349 |
|                    | H  | 3.293467 | 3.927513 | -2.59642 |
|                    | C  | 3.028842 | 0.781413 | -3.65152 |
|                    | H  | 3.730359 | 0.775022 | -2.81249 |
|                    | H  | 2.517537 | -0.18455 | -3.67905 |
|                    | H  | 3.609553 | 0.887688 | -4.57271 |
|                    | O  | 0.639318 | 2.096295 | -4.71049 |
|                    | H  | 0.814487 | 2.521591 | -5.5555  |

|                    |    |          |          |          |
|--------------------|----|----------|----------|----------|
|                    | C  | 3.63402  | 1.430734 | 1.972532 |
|                    | H  | 3.870307 | 2.226487 | 2.668009 |
|                    | C  | 2.74146  | 1.986701 | 0.858333 |
|                    | O  | 2.396066 | 1.078304 | -0.03294 |
|                    | O  | 2.422183 | 3.153133 | 0.85522  |
|                    | Cl | 5.19013  | 0.830182 | 1.298063 |
|                    | Cl | 2.776149 | 0.148409 | 2.897037 |
|                    | H  | 1.824784 | 1.466241 | -0.75279 |
| <b>PDMS x MBAA</b> |    |          |          |          |
|                    | C  | -0.95386 | 0.831417 | -0.29261 |
|                    | H  | -0.73033 | -0.20315 | -0.5655  |
|                    | H  | -0.38719 | 1.082814 | 0.607761 |
|                    | H  | -2.01739 | 0.894878 | -0.0433  |
|                    | Si | -0.56698 | 1.998281 | -1.68995 |
|                    | O  | 1.038196 | 1.748586 | -2.18226 |
|                    | O  | -1.55267 | 1.582958 | -2.9746  |
|                    | H  | -1.19508 | 1.865276 | -3.83077 |
|                    | C  | -0.77808 | 3.795319 | -1.22556 |
|                    | H  | -1.80115 | 3.982234 | -0.88557 |
|                    | H  | -0.09669 | 4.073291 | -0.4163  |
|                    | H  | -0.58101 | 4.451874 | -2.07772 |
|                    | Si | 1.847617 | 2.079685 | -3.62066 |
|                    | C  | 2.911562 | 3.599483 | -3.43911 |
|                    | H  | 3.409276 | 3.838083 | -4.38402 |
|                    | H  | 2.318067 | 4.465928 | -3.13609 |
|                    | H  | 3.687831 | 3.436002 | -2.68587 |
|                    | C  | 2.806654 | 0.56244  | -4.11949 |
|                    | H  | 3.584625 | 0.326605 | -3.38791 |
|                    | H  | 2.145504 | -0.30374 | -4.20895 |
|                    | H  | 3.293726 | 0.722047 | -5.08619 |
|                    | O  | 0.572438 | 2.361592 | -4.68738 |
|                    | H  | 0.733069 | 2.875598 | -5.48456 |
|                    | C  | 4.071901 | 0.220618 | 1.452514 |
|                    | C  | 3.186899 | 1.07475  | 0.5717   |
|                    | O  | 2.641398 | 0.379085 | -0.42308 |
|                    | O  | 3.015752 | 2.26048  | 0.758288 |
|                    | H  | 4.66254  | -0.48376 | 0.874477 |
|                    | H  | 4.691478 | 0.845596 | 2.085124 |
|                    | Br | 2.957692 | -0.87115 | 2.671278 |
|                    | H  | 2.063183 | 0.953482 | -0.98846 |
| <b>PDMS x MCAA</b> |    |          |          |          |
|                    | C  | -1.22542 | 0.865092 | -0.35671 |
|                    | H  | -0.93794 | -0.17032 | -0.55678 |
|                    | H  | -0.75257 | 1.182188 | 0.576539 |
|                    | H  | -2.30879 | 0.893943 | -0.20591 |
|                    | Si | -0.76014 | 1.982032 | -1.77095 |
|                    | O  | 0.895183 | 1.790331 | -2.09716 |
|                    | O  | -1.59658 | 1.456207 | -3.11907 |
|                    | H  | -1.17145 | 1.714961 | -3.95144 |
|                    | C  | -1.09672 | 3.786072 | -1.42316 |
|                    | H  | -2.1556  | 3.9372   | -1.1927  |



|                    |    |          |          |          |
|--------------------|----|----------|----------|----------|
|                    | H  | -0.51115 | 4.13603  | -0.56808 |
|                    | H  | -0.84719 | 4.410546 | -2.28564 |
|                    | Si | 1.824319 | 2.101977 | -3.46696 |
|                    | C  | 2.780177 | 3.688956 | -3.2619  |
|                    | H  | 3.357395 | 3.912508 | -4.16426 |
|                    | H  | 2.112468 | 4.531565 | -3.06448 |
|                    | H  | 3.483702 | 3.607247 | -2.42824 |
|                    | C  | 2.908338 | 0.622112 | -3.78993 |
|                    | H  | 3.619799 | 0.466683 | -2.97404 |
|                    | H  | 2.307392 | -0.28472 | -3.89894 |
|                    | H  | 3.481288 | 0.765636 | -4.71101 |
|                    | O  | 0.647557 | 2.258805 | -4.66428 |
|                    | H  | 0.858837 | 2.744977 | -5.46715 |
|                    | C  | 3.669831 | 0.605486 | 1.868357 |
|                    | H  | 3.212679 | 0.777714 | 2.840604 |
|                    | C  | 2.835346 | 1.314822 | 0.816177 |
|                    | O  | 2.343726 | 0.547998 | -0.14209 |
|                    | O  | 2.667703 | 2.513541 | 0.905231 |
|                    | H  | 4.666412 | 1.042516 | 1.865476 |
|                    | Cl | 3.863907 | -1.17992 | 1.672496 |
|                    | H  | 1.817397 | 1.084596 | -0.79235 |
| <b>PDMS x TBAA</b> | C  | -1.04635 | 0.999694 | -0.23968 |
|                    | H  | -0.74518 | -0.04297 | -0.36908 |
|                    | H  | -0.54592 | 1.398299 | 0.64665  |
|                    | H  | -2.1236  | 1.020637 | -0.04922 |
|                    | Si | -0.66261 | 2.010102 | -1.75413 |
|                    | O  | 0.988111 | 1.824817 | -2.12804 |
|                    | O  | -1.53412 | 1.359075 | -3.02183 |
|                    | H  | -1.16355 | 1.584078 | -3.88915 |
|                    | C  | -1.02438 | 3.829507 | -1.53891 |
|                    | H  | -2.07602 | 3.977352 | -1.27559 |
|                    | H  | -0.41217 | 4.258883 | -0.74064 |
|                    | H  | -0.82617 | 4.387501 | -2.45831 |
|                    | Si | 1.846913 | 2.093877 | -3.55693 |
|                    | C  | 2.77514  | 3.707244 | -3.4689  |
|                    | H  | 3.306288 | 3.897308 | -4.40662 |
|                    | H  | 2.099573 | 4.54572  | -3.28142 |
|                    | H  | 3.517054 | 3.678705 | -2.66562 |
|                    | C  | 2.944694 | 0.621071 | -3.862   |
|                    | H  | 3.698977 | 0.51795  | -3.07702 |
|                    | H  | 2.358257 | -0.30089 | -3.89873 |
|                    | H  | 3.468089 | 0.731902 | -4.81646 |
|                    | O  | 0.610293 | 2.169172 | -4.69891 |
|                    | H  | 0.760597 | 2.648076 | -5.51963 |
|                    | C  | 3.91688  | 0.710607 | 1.674224 |
|                    | C  | 3.017199 | 1.495401 | 0.673695 |
|                    | O  | 2.501052 | 0.688739 | -0.23096 |
|                    | O  | 2.847365 | 2.684674 | 0.753276 |
|                    | Br | 4.647025 | 1.911336 | 3.032481 |
|                    | Br | 5.39831  | -0.11241 | 0.66188  |

|                    |    |          |          |          |
|--------------------|----|----------|----------|----------|
|                    | Br | 2.830517 | -0.68427 | 2.548662 |
|                    | H  | 1.935405 | 1.187515 | -0.88889 |
| <b>PDMS x TCAA</b> | C  | -0.83087 | 0.882664 | -0.04547 |
|                    | H  | -0.57353 | -0.15499 | -0.2732  |
|                    | H  | -0.22224 | 1.212968 | 0.800254 |
|                    | H  | -1.87853 | 0.911613 | 0.268842 |
|                    | Si | -0.59362 | 1.977411 | -1.53147 |
|                    | O  | 1.000121 | 1.781647 | -2.09887 |
|                    | O  | -1.61899 | 1.423707 | -2.72766 |
|                    | H  | -1.33105 | 1.673215 | -3.61958 |
|                    | C  | -0.87555 | 3.787514 | -1.17068 |
|                    | H  | -1.88722 | 3.944333 | -0.78464 |
|                    | H  | -0.16717 | 4.152202 | -0.42126 |
|                    | H  | -0.76075 | 4.395335 | -2.07252 |
|                    | Si | 1.699421 | 2.048659 | -3.6128  |
|                    | C  | 2.698058 | 3.621477 | -3.59929 |
|                    | H  | 3.125843 | 3.815107 | -4.58766 |
|                    | H  | 2.083359 | 4.480022 | -3.31686 |
|                    | H  | 3.524818 | 3.543119 | -2.88736 |
|                    | C  | 2.693242 | 0.539618 | -4.06299 |
|                    | H  | 3.517459 | 0.384375 | -3.36097 |
|                    | H  | 2.065043 | -0.35519 | -4.05822 |
|                    | H  | 3.1223   | 0.651403 | -5.06322 |
|                    | O  | 0.348152 | 2.198717 | -4.6078  |
|                    | H  | 0.421416 | 2.706641 | -5.42156 |
|                    | C  | 4.325843 | 0.851004 | 1.408309 |
|                    | C  | 3.354554 | 1.596895 | 0.433935 |
|                    | O  | 3.245855 | 2.794365 | 0.425656 |
|                    | O  | 2.711437 | 0.736252 | -0.32479 |
|                    | H  | 2.082954 | 1.197098 | -0.95375 |
|                    | Cl | 5.480743 | -0.13878 | 0.447055 |
|                    | Cl | 5.229409 | 2.024525 | 2.399656 |
|                    | Cl | 3.351466 | -0.21838 | 2.480272 |

Figures S1 – S9 depict the ball and stick models of the sorbent monomers interacting with the analyte molecules after DFT calculations.

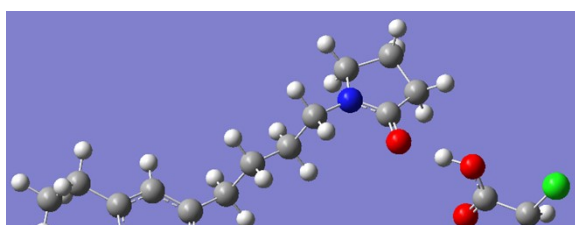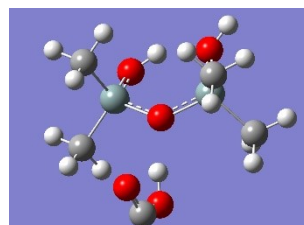

Figure S1 – Ball and stick model of the HLB (left) and PDMS (right) monomers and MCAA interaction after DFT calculations.

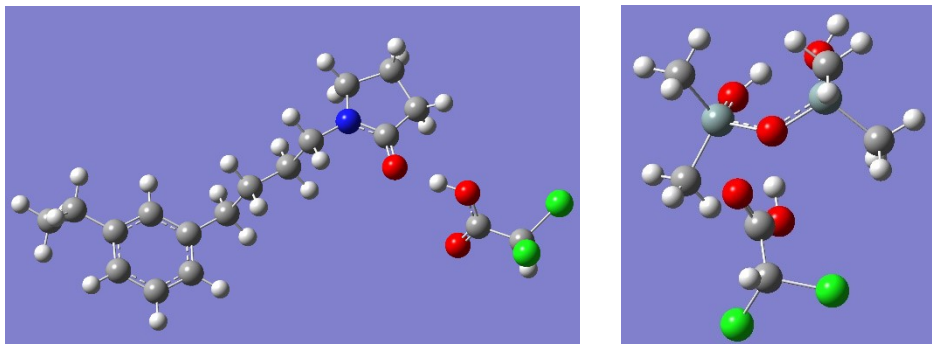

Figure S2 – Ball and stick model of the HLB (left) and PDMS (right) monomers and DCAA interaction after DFT calculations.

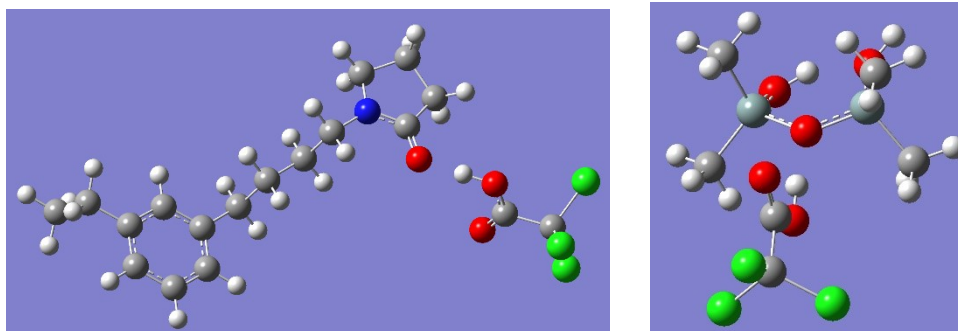

Figure S3 – Ball and stick model of the HLB (left) and PDMS (right) monomers and TCAA interaction after DFT calculations.

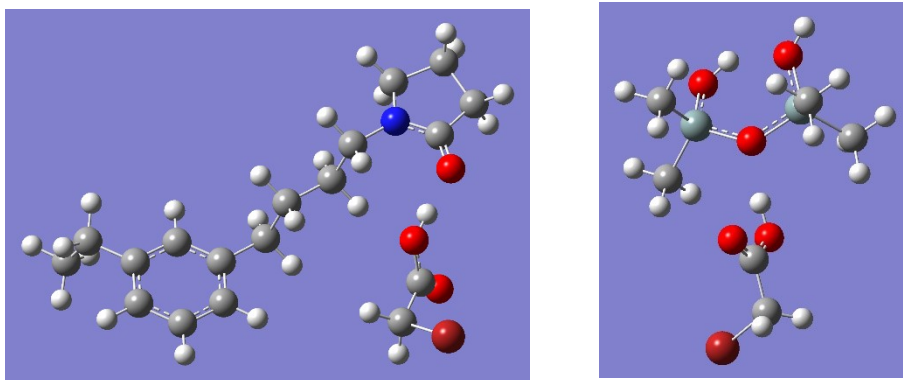

Figure S4 – Ball and stick model of the HLB (left) and PDMS (right) monomers and MBAA interaction after DFT calculations.

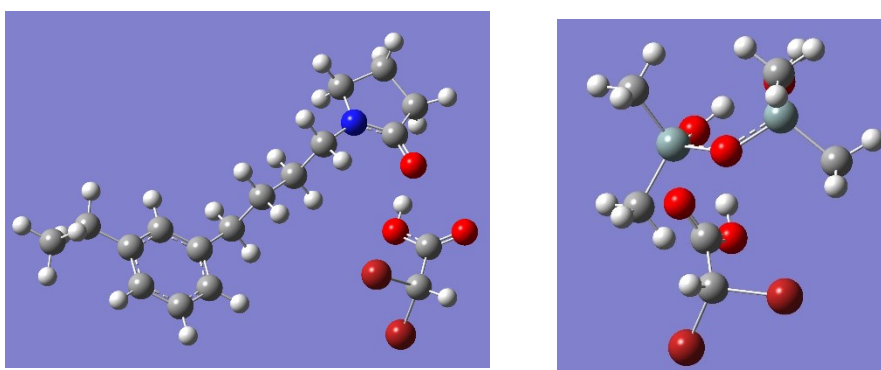

Figure S5 – Ball and stick model of the HLB (left) and PDMS (right) monomers and DBAA interaction after DFT calculations.

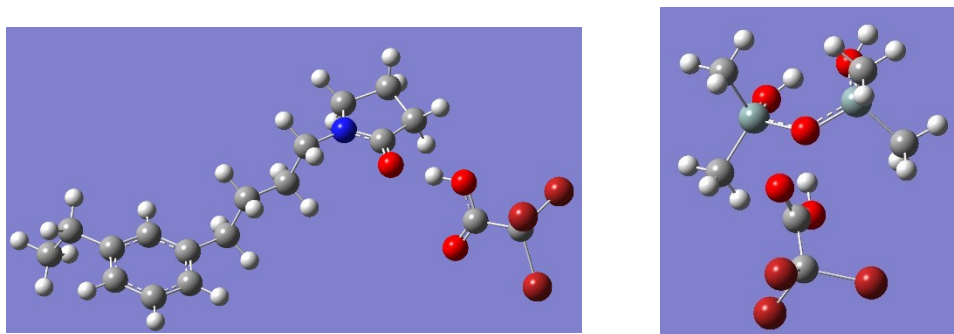

Figure S6 – Ball and stick model of the HLB (left) and PDMS (right) monomers and TBAA interaction after DFT calculations.

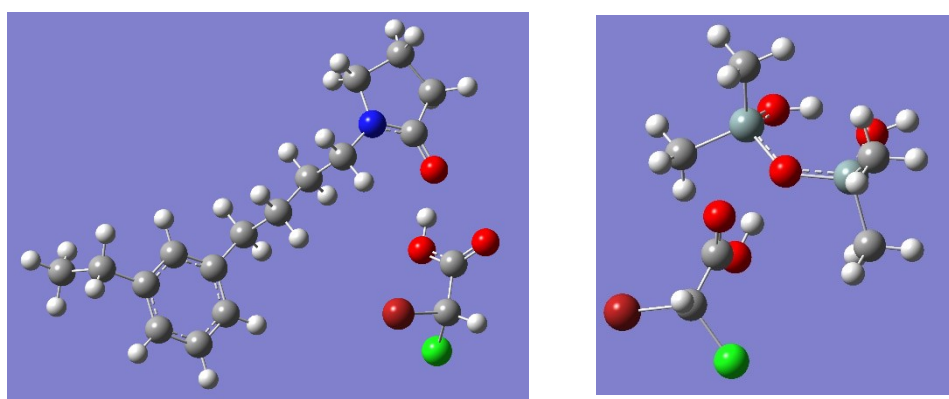

Figure S7 – Ball and stick model of the HLB (left) and PDMS (right) monomers and BCAA interaction after DFT calculations.

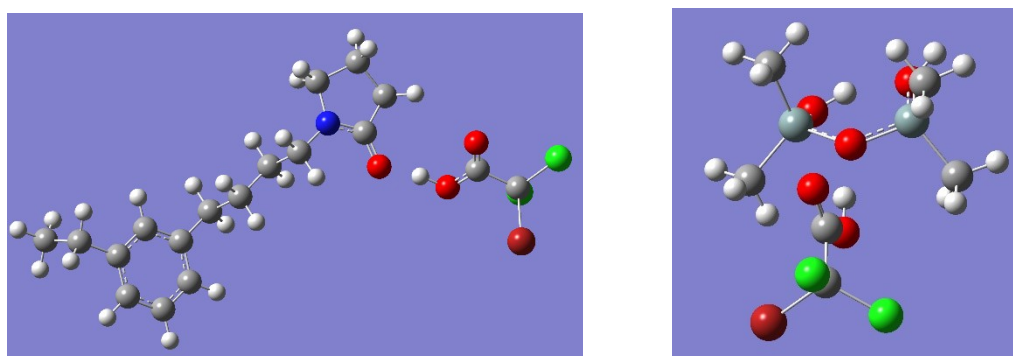

Figure S8 – Ball and stick model of the HLB (left) and PDMS (right) monomers and BDCAA interaction after DFT calculations.

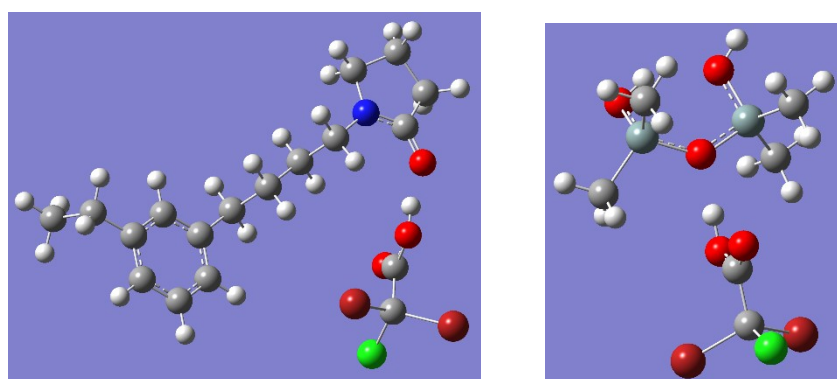

Figure S9 – Ball and stick model of the HLB (left) and PDMS (right) monomers and CDBAA interaction after DFT calculations.

Table S4: Geometries of the analytes and interfaces showing the hydrogen bonding character of the interfaces.

|              | X-H<br>analyte | HLB              |                            |                  | PDMS             |               |                  |
|--------------|----------------|------------------|----------------------------|------------------|------------------|---------------|------------------|
|              |                | X-H<br>interface | Bond<br>angle<br>interface | H-Y<br>interface | X-H<br>interface | Bond<br>angle | H-Y<br>interface |
| <b>MCAA</b>  | 0.971          | 1.019            | 172                        | 1.564            | 0.994            | 171           | 1.746            |
| <b>DCAA</b>  | 0.971          | 1.029            | 174                        | 1.520            | 0.998            | 171           | 1.709            |
| <b>TCAA</b>  | 0.971          | 1.042            | 174                        | 1.474            | 1.001            | 173           | 1.681            |
| <b>MBAA</b>  | 0.971          | 1.006            | 172                        | 1.615            | 0.991            | 171           | 1.763            |
| <b>DBAA</b>  | 0.971          | 1.014            | 176                        | 1.571            | 0.997            | 171           | 1.715            |
| <b>TBAA</b>  | 0.971          | 1.038            | 175                        | 1.487            | 1.001            | 172           | 1.685            |
| <b>CDBAA</b> | 0.971          | 1.021            | 171                        | 1.536            | 1.001            | 172           | 1.681            |
| <b>BDCAA</b> | 0.971          | 1.040            | 172                        | 1.479            | 1.001            | 172           | 1.680            |
| <b>BCAA</b>  | 0.971          | 1.015            | 174                        | 1.565            | 0.997            | 172           | 1.718            |

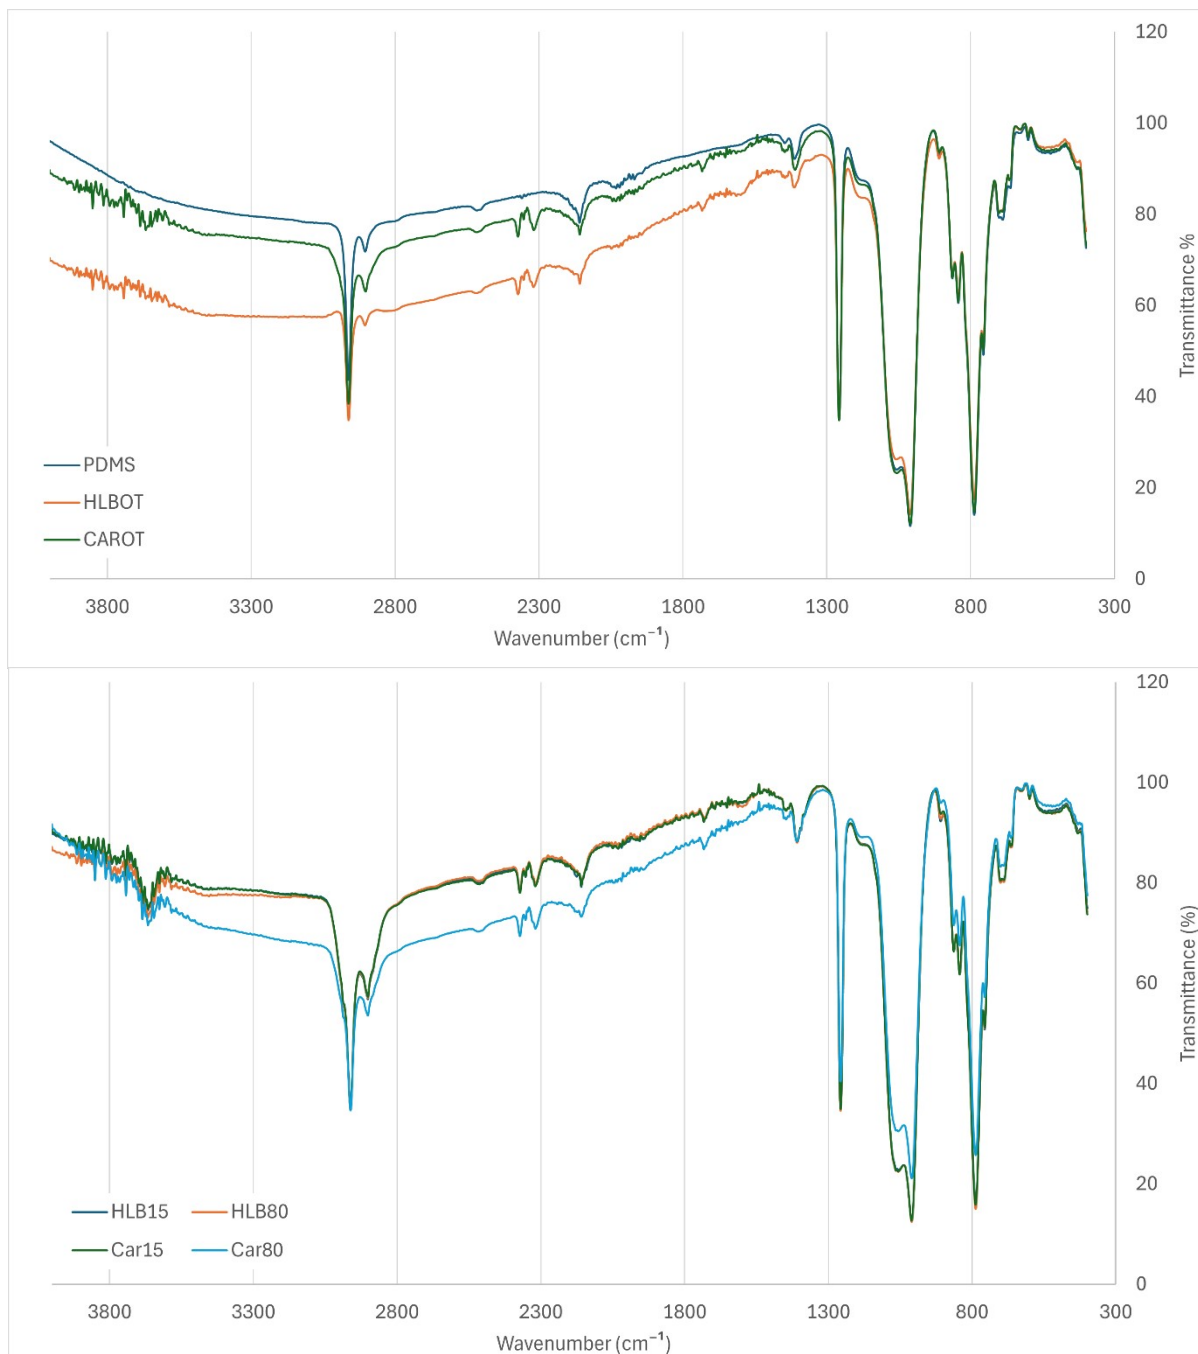

Figure S10 – FTIR spectra of the PDMS thin film, and the HLB and Carboxen® impregnated thin films. At the top the PDMS thin film and the film with the sorbent added to the surface directly are shown. At the bottom the PDMS thin films with the sorbent added to the PDMS prior to synthesis are shown.

Table S5: Amounts of sorbents added to achieve different film coverages, as well as the percent coverage and average particle sizes, as determined with ImageJ from micrographs.

| Mass added | % coverage | Average particle | Mass added | % coverage | Average particle |
|------------|------------|------------------|------------|------------|------------------|
|------------|------------|------------------|------------|------------|------------------|

|            | (g)   | size ( $\mu\text{m}$ ) |       |           | (g)   | size ( $\mu\text{m}$ ) |        |
|------------|-------|------------------------|-------|-----------|-------|------------------------|--------|
|            |       | <b>HLB15</b>           |       |           |       | <b>Car15</b>           |        |
| film4_2    | 0.203 | 17.5                   | 565   | film4_1   | 0.509 | 14.4                   | 740.1  |
| film2_1    |       | 15.3                   | 676.6 | film4_1   |       | 18.4                   | 766.9  |
| film5_2    |       | 13.1                   | 613.7 | film1_1   |       | 20.2                   | 2704.3 |
|            |       |                        |       | film1_1   |       | 22.3                   | 2770.3 |
| average    |       | 15.3                   | 618.8 | average   |       | 18.8                   | 1745.4 |
| Std. dev.  |       | 2.19                   | 55.5  | Std. dev. |       | 1.75                   | 944.3  |
| %RSD       |       | 14.3                   | 8.97  | %RSD      |       | 9.32                   | 54.1   |
|            |       | <b>HLB80</b>           |       |           |       | <b>Car80</b>           |        |
| filmn2_4s1 | 1.11  | 52.9                   | 537.8 | Car_n_2_4 | 2.41  | 63.3                   |        |
| filmn2_4s2 |       | 68.6                   | 648.7 | Car_n_2_4 |       | 95.7                   |        |
| filmn2_4s3 |       | 81.5                   | 653.7 | Car_n_2_4 |       | 85.3                   |        |
| average    |       | 67.7                   | 613.4 | average   |       | 81.5                   |        |
| Std. dev.  |       | 14.3                   | 65.5  | Std. dev. |       | 16.5                   |        |
| %RSD       |       | 21.2                   | 10.7  | %RSD      |       | 20.3                   |        |
|            |       | <b>HLBOT</b>           |       |           |       | <b>CarOT</b>           |        |
| film1      | 0.509 |                        |       | film1     | 1.28  |                        |        |

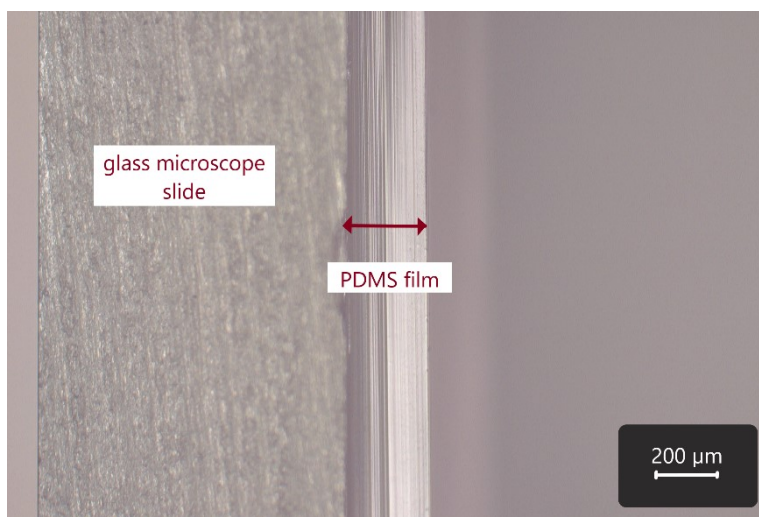

Figure S11 - Light micrograph of the side view of a PDMS film adhering to a glass microscope slide to measure the film thickness. Lines visible in the film stem from the layered approach of the synthesis process and are due to the light reflecting and refracting from the cut edge of the film.

Table S6: Summary of the p-values for the single factor ANOVA (95% confidence level), between the means of the two types of control groups (EPA and EPA\_ON).

|              | MCA<br>A | MBA<br>A | DCAA  | DBAA  | TCAA  | TBAA  | BCAA  | BDCA<br>A | CDBA<br>A |
|--------------|----------|----------|-------|-------|-------|-------|-------|-----------|-----------|
| EPA & EPA_ON | 0.285    | 0.279    | 0.258 | 0.203 | 0.865 | 0.073 | 0.515 | 0.029     | 0.087     |
